# Supplementary material for: A Protocol for a Rapid Realist Review of Literature Examining Co-Production in Youth Mental Health Services
Source: MDPI journal article supplement (doi:10.3390/youth4010001), 2023-12-20
Supplement: s1 [file s1]

Table S1: Full Search Terms

KEY:

red text = subject heading searching

black text = key word searching

| <b>SCOPUS</b> |                                                                                                                                                                                                                                                                                                                                                                                                                                                                                     |
|---------------|-------------------------------------------------------------------------------------------------------------------------------------------------------------------------------------------------------------------------------------------------------------------------------------------------------------------------------------------------------------------------------------------------------------------------------------------------------------------------------------|
|               | <b>CO-PRODUCTION</b>                                                                                                                                                                                                                                                                                                                                                                                                                                                                |
| 1             | co-produc* OR coproduc* OR co-design* OR codesign* OR "youth advisory" OR "advisory committee*" OR "advisory board*" OR "advisory group*" OR "youth-adult partnership*" OR co-creat* OR co-delivery OR "partnership working" OR co-innovation OR co-evaluation OR youth-led OR "equal voice" OR "youth voice" OR "youth-led advocacy" OR "lived experience" OR "expert by experience" OR ((patient* OR stakeholder* OR youth*) W/O (engage* OR participat*))                        |
|               | <b>YOUTH</b>                                                                                                                                                                                                                                                                                                                                                                                                                                                                        |
| 2             | Pediatrics OR paediatrics OR teen* OR youth* OR "young people" OR "young person" OR child OR adolesc* OR "young adult"                                                                                                                                                                                                                                                                                                                                                              |
|               | <b>MENTAL HEALTH SERVICES</b>                                                                                                                                                                                                                                                                                                                                                                                                                                                       |
| 3             | "Mental health care" OR "mental health*" OR "mental health services" OR "community mental health services" OR "Psychiatric hospitals" OR "forensic psychiatry" OR "child psychology" OR "child psychiatry" OR "adolescent psychiatry" OR "adolescent psychology" OR "clinical psychology" OR psychiatry OR "school mental health services" OR "psychiatric patients" OR "psychiatric service*" OR "youth mental health" OR "camhs" OR "child and adolescent mental health service*" |
|               | 1 AND 2 AND 3                                                                                                                                                                                                                                                                                                                                                                                                                                                                       |

| <b>ProQuest Dissertations and Theses Global</b> |                                                                                                                                                                                                                                                                                                                                                                                                                                                                                     |
|-------------------------------------------------|-------------------------------------------------------------------------------------------------------------------------------------------------------------------------------------------------------------------------------------------------------------------------------------------------------------------------------------------------------------------------------------------------------------------------------------------------------------------------------------|
|                                                 | <b>CO-PRODUCTION</b>                                                                                                                                                                                                                                                                                                                                                                                                                                                                |
| 1                                               | co-produc* OR coproduc* OR co-design* OR codesign* OR “youth advisory” OR “advisory committee*” OR “advisory board*” OR “advisory group*” OR “youth-adult partnership*” OR co-creat* OR co-delivery OR “partnership working” OR co-innovation OR co-evaluation OR youth-led OR “equal voice” OR “youth voice” OR “youth-led advocacy” OR “lived experience” OR “expert by experience” OR ((patient* OR stakeholder* OR youth*) adj0 (engage* OR participat*))                       |
|                                                 | <b>YOUTH</b>                                                                                                                                                                                                                                                                                                                                                                                                                                                                        |
| 2                                               | Pediatrics OR paediatrics OR teen* OR youth* OR “young people” OR “young person” OR child OR adolesc* or “young adult”                                                                                                                                                                                                                                                                                                                                                              |
|                                                 | <b>MENTAL HEALTH SERVICES</b>                                                                                                                                                                                                                                                                                                                                                                                                                                                       |
| 3                                               | “Mental health care” OR “mental health*” OR “mental health services” OR “community mental health services” OR “Psychiatric hospitals” OR “forensic psychiatry” OR “child psychology” OR “child psychiatry” OR “adolescent psychiatry” OR “adolescent psychology” OR “clinical psychology” OR psychiatry OR “school mental health services” OR “psychiatric patients” OR “psychiatric service*” OR “youth mental health” OR “camhs” OR “child and adolescent mental health service*” |
|                                                 | 1 AND 2 AND 3                                                                                                                                                                                                                                                                                                                                                                                                                                                                       |

| <b>CINAHL plus</b> |                                                                                                                                                                                                                                                                                                                                                                                                                                                                         |
|--------------------|-------------------------------------------------------------------------------------------------------------------------------------------------------------------------------------------------------------------------------------------------------------------------------------------------------------------------------------------------------------------------------------------------------------------------------------------------------------------------|
|                    | <b>CO-PRODUCTION</b>                                                                                                                                                                                                                                                                                                                                                                                                                                                    |
| 1                  | consumer participation                                                                                                                                                                                                                                                                                                                                                                                                                                                  |
| 2                  | stakeholder participation                                                                                                                                                                                                                                                                                                                                                                                                                                               |
| 3                  | co-produc* OR coproduc* OR "co-design*" OR codesign* OR "youth advisory" OR "advisory board*" OR "advisory committee*" OR "advisory group*" OR "youth-adult partnership*" OR "co-creat*" OR "co-delivery" OR "partnership working" OR "co-innovation" OR "co-evaluation" OR "youth-led" OR "equal voice" OR "youth voice" OR "youth-led advocacy" OR "lived experience" OR "expert by experience" OR ((patient* OR stakeholder* OR youth*) N0 (engage* OR participat*)) |
|                    |                                                                                                                                                                                                                                                                                                                                                                                                                                                                         |
|                    | <b>YOUTH</b>                                                                                                                                                                                                                                                                                                                                                                                                                                                            |
| 4                  | pediatrics                                                                                                                                                                                                                                                                                                                                                                                                                                                              |
| 5                  | transition to adulthood                                                                                                                                                                                                                                                                                                                                                                                                                                                 |
| 6                  | child                                                                                                                                                                                                                                                                                                                                                                                                                                                                   |
| 7                  | adolescence                                                                                                                                                                                                                                                                                                                                                                                                                                                             |
| 8                  | young adult                                                                                                                                                                                                                                                                                                                                                                                                                                                             |
| 9                  | teen* OR youth* OR young people OR young person OR paediatrics                                                                                                                                                                                                                                                                                                                                                                                                          |
|                    |                                                                                                                                                                                                                                                                                                                                                                                                                                                                         |
|                    | <b>MENTAL HEALTH SERVICES</b>                                                                                                                                                                                                                                                                                                                                                                                                                                           |
| 10                 | mental health                                                                                                                                                                                                                                                                                                                                                                                                                                                           |
| 11                 | mental health services                                                                                                                                                                                                                                                                                                                                                                                                                                                  |
| 12                 | community mental health services                                                                                                                                                                                                                                                                                                                                                                                                                                        |
| 13                 | hospitals, psychiatric                                                                                                                                                                                                                                                                                                                                                                                                                                                  |
| 14                 | psychiatric patients                                                                                                                                                                                                                                                                                                                                                                                                                                                    |
| 15                 | forensic psychiatry                                                                                                                                                                                                                                                                                                                                                                                                                                                     |
| 16                 | child psychology                                                                                                                                                                                                                                                                                                                                                                                                                                                        |
| 17                 | child psychiatry                                                                                                                                                                                                                                                                                                                                                                                                                                                        |
| 18                 | adolescent psychiatry                                                                                                                                                                                                                                                                                                                                                                                                                                                   |
| 19                 | adolescent psychology                                                                                                                                                                                                                                                                                                                                                                                                                                                   |
| 20                 | psychology, clinical                                                                                                                                                                                                                                                                                                                                                                                                                                                    |
| 21                 | psychiatry                                                                                                                                                                                                                                                                                                                                                                                                                                                              |
| 22                 | psychiatric service                                                                                                                                                                                                                                                                                                                                                                                                                                                     |
| 23                 | school mental health services                                                                                                                                                                                                                                                                                                                                                                                                                                           |
| 24                 | "youth mental health" OR camhs OR "child and adolescent mental health service*" OR "mental healthcare"                                                                                                                                                                                                                                                                                                                                                                  |
| 25                 | 1 OR 2 OR 3                                                                                                                                                                                                                                                                                                                                                                                                                                                             |
| 26                 | 4 OR 5 OR 6 OR 7 OR 8 OR 9                                                                                                                                                                                                                                                                                                                                                                                                                                              |
| 27                 | 10 OR 11 OR 12 OR 13 OR 14 OR 15 OR 16 OR 17 OR 18 OR 19 OR 20 OR 21 OR 22 OR 23 OR 24                                                                                                                                                                                                                                                                                                                                                                                  |
| 28                 | 25 AND 26 AND 27                                                                                                                                                                                                                                                                                                                                                                                                                                                        |

## Ovid MEDLINE(R) and In-Process, In-Data-Review & Other Non-Indexed Citations

|    |                                                                                                                                                                                                                                                                                                                                                                                                                  |
|----|------------------------------------------------------------------------------------------------------------------------------------------------------------------------------------------------------------------------------------------------------------------------------------------------------------------------------------------------------------------------------------------------------------------|
|    | <b>CO-PRODUCTION</b>                                                                                                                                                                                                                                                                                                                                                                                             |
| 1  | patient participation                                                                                                                                                                                                                                                                                                                                                                                            |
| 2  | stakeholder participation                                                                                                                                                                                                                                                                                                                                                                                        |
| 3  | advisory committees                                                                                                                                                                                                                                                                                                                                                                                              |
| 4  | co-produc* OR coproduc* OR co-design* OR codesign* OR youth advisory OR advisory board* OR advisory group* OR youth-adult partnership* OR co-creat* OR co-delivery OR partnership working OR co-innovation OR co-evaluation OR youth-led OR equal voice OR youth voice OR youth-led advocacy OR lived experience OR expert by experience OR ((patient* OR stakeholder* OR youth*) adj0 (engage* OR participat*)) |
|    |                                                                                                                                                                                                                                                                                                                                                                                                                  |
|    | <b>YOUTH</b>                                                                                                                                                                                                                                                                                                                                                                                                     |
| 5  | pediatrics                                                                                                                                                                                                                                                                                                                                                                                                       |
| 6  | transition to adult care                                                                                                                                                                                                                                                                                                                                                                                         |
| 7  | child                                                                                                                                                                                                                                                                                                                                                                                                            |
| 8  | adolescence                                                                                                                                                                                                                                                                                                                                                                                                      |
| 9  | young adult                                                                                                                                                                                                                                                                                                                                                                                                      |
| 10 | teen* OR youth* OR young people OR young person OR paediatrics                                                                                                                                                                                                                                                                                                                                                   |
|    |                                                                                                                                                                                                                                                                                                                                                                                                                  |
|    | <b>MENTAL HEALTH SERVICES</b>                                                                                                                                                                                                                                                                                                                                                                                    |
| 11 | mental health                                                                                                                                                                                                                                                                                                                                                                                                    |
| 12 | mental health services                                                                                                                                                                                                                                                                                                                                                                                           |
| 13 | community mental health services                                                                                                                                                                                                                                                                                                                                                                                 |
| 14 | hospitals, psychiatric                                                                                                                                                                                                                                                                                                                                                                                           |
| 15 | forensic psychiatry                                                                                                                                                                                                                                                                                                                                                                                              |
| 16 | psychology, child                                                                                                                                                                                                                                                                                                                                                                                                |
| 17 | child psychiatry                                                                                                                                                                                                                                                                                                                                                                                                 |
| 18 | adolescent psychiatry                                                                                                                                                                                                                                                                                                                                                                                            |
| 19 | psychology, adolescent                                                                                                                                                                                                                                                                                                                                                                                           |
| 20 | psychology, clinical                                                                                                                                                                                                                                                                                                                                                                                             |
| 21 | psychiatry                                                                                                                                                                                                                                                                                                                                                                                                       |
| 22 | school mental health services                                                                                                                                                                                                                                                                                                                                                                                    |
| 23 | psychiatric patients, psychiatric service, youth mental health OR camhs OR (child and adolescent mental health service*)                                                                                                                                                                                                                                                                                         |
| 24 | 1 OR 2 OR 3 OR 4                                                                                                                                                                                                                                                                                                                                                                                                 |
| 25 | 5 OR 6 OR 7 OR 8 OR 9 OR 10                                                                                                                                                                                                                                                                                                                                                                                      |
| 26 | 11 OR 12 OR 13 OR 14 OR 15 OR 16 OR 17 OR 18 OR 19 OR 20 OR 21 OR 22 OR 23                                                                                                                                                                                                                                                                                                                                       |
| 27 | 24 AND 25 AND 26                                                                                                                                                                                                                                                                                                                                                                                                 |

| <b>Social Policy and Practice</b> |                                                                                                                                                                                                                                                                                                                                                                                                                                                                                   |
|-----------------------------------|-----------------------------------------------------------------------------------------------------------------------------------------------------------------------------------------------------------------------------------------------------------------------------------------------------------------------------------------------------------------------------------------------------------------------------------------------------------------------------------|
|                                   | <b>CO-PRODUCTION</b>                                                                                                                                                                                                                                                                                                                                                                                                                                                              |
| 1                                 | co-produc* OR coproduc* OR co-design* OR codesign* OR (youth advisory) OR (advisory committee*) OR (advisory board*) OR (advisory group*) OR (youth-adult partnership*) OR co-creat* OR co-delivery OR (partnership working) OR co-innovation OR co-evaluation OR youth-led OR (equal voice) OR (youth voice) OR (youth-led advocacy) OR (lived experience) OR (expert by experience) OR ((patient* OR stakeholder* OR youth*) adj0 (engage* OR participat*))                     |
|                                   | <b>YOUTH</b>                                                                                                                                                                                                                                                                                                                                                                                                                                                                      |
| 2                                 | Pediatrics OR paediatrics OR teen* OR youth* OR (young people) OR (young person) OR child OR adolesc* or (young adult)                                                                                                                                                                                                                                                                                                                                                            |
|                                   | <b>MENTAL HEALTH SERVICES</b>                                                                                                                                                                                                                                                                                                                                                                                                                                                     |
| 3                                 | (Mental health care) OR (mental health*) OR (mental health services) OR (community mental health services) OR (Psychiatric hospitals) OR (forensic psychiatry) OR (child psychology) OR (child psychiatry) OR (adolescent psychiatry) OR (adolescent psychology) OR (clinical psychology) OR psychiatry OR (school mental health services) OR (psychiatric patients) OR (psychiatric service*) OR (youth mental health) OR camhs OR (child and adolescent mental health service*) |
|                                   | 1 AND 2 AND 3                                                                                                                                                                                                                                                                                                                                                                                                                                                                     |

| <b>PsycINFO</b> |                                                                                                                                                                                                                                                                                                                                                                                                                                         |
|-----------------|-----------------------------------------------------------------------------------------------------------------------------------------------------------------------------------------------------------------------------------------------------------------------------------------------------------------------------------------------------------------------------------------------------------------------------------------|
|                 | <b>CO-PRODUCTION</b>                                                                                                                                                                                                                                                                                                                                                                                                                    |
| 1               | client participation                                                                                                                                                                                                                                                                                                                                                                                                                    |
| 2               | co-produc* OR coproduc* OR co-design* OR codesign* OR youth advisory OR advisory board* OR advisory committee* OR advisory group* OR youth-adult partnership* OR co-creat* OR co-delivery OR partnership working OR co-innovation OR co-evaluation OR youth-led OR equal voice OR youth voice OR youth-led advocacy OR lived experience OR expert by experience OR ((patient* OR stakeholder* OR youth*) adj0 (engage* OR participat*)) |
|                 |                                                                                                                                                                                                                                                                                                                                                                                                                                         |
|                 | <b>YOUTH</b>                                                                                                                                                                                                                                                                                                                                                                                                                            |
| 3               | pediatrics                                                                                                                                                                                                                                                                                                                                                                                                                              |
| 4               | early adolescence                                                                                                                                                                                                                                                                                                                                                                                                                       |
| 5               | late adolescence                                                                                                                                                                                                                                                                                                                                                                                                                        |
| 6               | emerging adulthood                                                                                                                                                                                                                                                                                                                                                                                                                      |
| 7               | child* OR teen* OR adolesc* OR youth* OR young adult* OR young people OR young person OR paediatrics                                                                                                                                                                                                                                                                                                                                    |
|                 |                                                                                                                                                                                                                                                                                                                                                                                                                                         |
|                 | <b>MENTAL HEALTH SERVICES</b>                                                                                                                                                                                                                                                                                                                                                                                                           |
| 8               | mental health                                                                                                                                                                                                                                                                                                                                                                                                                           |
| 9               | mental health services                                                                                                                                                                                                                                                                                                                                                                                                                  |
| 10              | youth mental health                                                                                                                                                                                                                                                                                                                                                                                                                     |
| 11              | community mental health services                                                                                                                                                                                                                                                                                                                                                                                                        |
| 12              | psychiatric hospitals                                                                                                                                                                                                                                                                                                                                                                                                                   |
| 13              | psychiatric patients                                                                                                                                                                                                                                                                                                                                                                                                                    |
| 14              | forensic psychiatry                                                                                                                                                                                                                                                                                                                                                                                                                     |
| 15              | child psychology                                                                                                                                                                                                                                                                                                                                                                                                                        |
| 16              | child psychiatry                                                                                                                                                                                                                                                                                                                                                                                                                        |
| 17              | adolescent psychiatry                                                                                                                                                                                                                                                                                                                                                                                                                   |
| 18              | adolescent psychology                                                                                                                                                                                                                                                                                                                                                                                                                   |
| 19              | clinical psychology                                                                                                                                                                                                                                                                                                                                                                                                                     |
| 20              | psychiatry                                                                                                                                                                                                                                                                                                                                                                                                                              |
| 21              | School Based Mental Health Services                                                                                                                                                                                                                                                                                                                                                                                                     |
| 22              | mental health programs                                                                                                                                                                                                                                                                                                                                                                                                                  |
| 23              | psychiatric services OR camhs OR (child and adolescent mental health service*)                                                                                                                                                                                                                                                                                                                                                          |
| 24              | 1 OR 2                                                                                                                                                                                                                                                                                                                                                                                                                                  |
| 25              | 3 OR 4 OR 5 OR 6 OR 7                                                                                                                                                                                                                                                                                                                                                                                                                   |
| 26              | 8 OR 9 OR 10 OR 11 OR 12 OR 13 OR 14 OR 15 OR 16 OR 17 OR 18 OR 19 OR 20 OR 21 OR 22 OR 23                                                                                                                                                                                                                                                                                                                                              |
| 27              | 24 AND 25 AND 26                                                                                                                                                                                                                                                                                                                                                                                                                        |

| <b>ASSIA</b> |                                                                                                                                                                                                                                                                                                                                                                                                                                                                                     |
|--------------|-------------------------------------------------------------------------------------------------------------------------------------------------------------------------------------------------------------------------------------------------------------------------------------------------------------------------------------------------------------------------------------------------------------------------------------------------------------------------------------|
|              | <b>CO-PRODUCTION</b>                                                                                                                                                                                                                                                                                                                                                                                                                                                                |
| 1            | co-produc* OR coproduc* OR co-design* OR codesign* OR “youth advisory” OR “advisory committee*” OR “advisory board*” OR “advisory group*” OR “youth-adult partnership*” OR co-creat* OR co-delivery OR “partnership working” OR co-innovation OR co-evaluation OR youth-led OR “equal voice” OR “youth voice” OR “youth-led advocacy” OR “lived experience” OR “expert by experience” OR ((patient* OR stakeholder* OR youth*) adj0 (engage* OR participat*))                       |
|              | <b>YOUTH</b>                                                                                                                                                                                                                                                                                                                                                                                                                                                                        |
| 2            | Pediatrics OR paediatrics OR teen* OR youth* OR “young people” OR “young person” OR child OR adolesc* or “young adult”                                                                                                                                                                                                                                                                                                                                                              |
|              | <b>MENTAL HEALTH SERVICES</b>                                                                                                                                                                                                                                                                                                                                                                                                                                                       |
| 3            | “Mental health care” OR “mental health*” OR “mental health services” OR “community mental health services” OR “Psychiatric hospitals” OR “forensic psychiatry” OR “child psychology” OR “child psychiatry” OR “adolescent psychiatry” OR “adolescent psychology” OR “clinical psychology” OR psychiatry OR “school mental health services” OR “psychiatric patients” OR “psychiatric service*” OR “youth mental health” OR “camhs” OR “child and adolescent mental health service*” |
|              | 1 AND 2 AND 3                                                                                                                                                                                                                                                                                                                                                                                                                                                                       |

| <b>Web of Science</b> |                                                                                                                                                                                                                                                                                                                                                                                                                                                                                    |
|-----------------------|------------------------------------------------------------------------------------------------------------------------------------------------------------------------------------------------------------------------------------------------------------------------------------------------------------------------------------------------------------------------------------------------------------------------------------------------------------------------------------|
|                       | <b>CO-PRODUCTION</b>                                                                                                                                                                                                                                                                                                                                                                                                                                                               |
| 1                     | co-produc* OR coproduc* OR co-design* OR codesign* OR "youth advisory" OR "advisory committee*" OR "advisory board*" OR "advisory group*" OR "youth-adult partnership*" OR co-creat* OR co-delivery OR "partnership working" OR co-innovation OR co-evaluation OR youth-led OR "equal voice" OR "youth voice" OR "youth-led advocacy" OR "lived experience" OR "expert by experience" OR ((patient* OR stakeholder* OR youth*) near/0 (engage* OR participat*))                    |
|                       | <b>YOUTH</b>                                                                                                                                                                                                                                                                                                                                                                                                                                                                       |
| 2                     | Pediatrics OR paediatrics OR teen* OR youth* OR "young people" OR "young person" OR child OR adolesc* or "young adult"                                                                                                                                                                                                                                                                                                                                                             |
|                       | <b>MENTAL HEALTH SERVICES</b>                                                                                                                                                                                                                                                                                                                                                                                                                                                      |
| 3                     | "Mental health care" OR "mental health*" OR "mental health services" OR "community mental health services" OR "Psychiatric hospitals" OR "forensic psychiatry" OR "child psychology" OR "child psychiatry" OR "adolescent psychiatry" OR "adolescent psychology" OR "clinical psychology" OR psychiatry OR "school mental health services" OR "psychiatric patients" OR "psychiatric service*" OR "youth mental health" OR "camhs" OR "child and adolescent mental health service" |
|                       | 1 AND 2 AND 3                                                                                                                                                                                                                                                                                                                                                                                                                                                                      |
