# Supplementary material for: A Protocol for a Rapid Realist Review of Literature Examining Co-Production in Youth Mental Health Services
Source: MDPI journal article supplement (doi:10.3390/youth4010001), 2023-12-20
Supplement: s1 [file s1]

Table S2: Initial Programme Theory Development and CMO Brainstorm

**Creating initial brainstorming lists of ‘contexts’, ‘mechanisms’ and ‘outcomes’, without creating specific CMO configurations.**

Material for this exercise was gathered from: youth advisory group workshop, workshop with researchers, initial scoping of literature, expert panel feedback, protocol reviewer comments, immersion of lead researcher in co-production literature.

| <b>CONTEXTS</b><br>Aspects beyond the programme with causal impact                                                                                                                                                                                                                                                                                                                                                                                                                                                                                                                                                                                                                                                                                                                                                                               | <b>MECHANISMS (explain how)</b><br>Resources: within the programme<br>Response: how these influence behaviour of participants.                                                                                                                                                                                                                                                                                                                                                                                                                                                                                                                                                                                                                                                                                                                                                                                                                                                                                                                                                                                                                                                                                                                                                                                                                                                                                                                                                                                                                                               | <b>OUTCOMES</b><br>Result of a mechanism acting in a context (action)                                                                                                                                                                                                                                                                                                                                                                                                                                                                                                                                                                                                                                                                                                               |
|--------------------------------------------------------------------------------------------------------------------------------------------------------------------------------------------------------------------------------------------------------------------------------------------------------------------------------------------------------------------------------------------------------------------------------------------------------------------------------------------------------------------------------------------------------------------------------------------------------------------------------------------------------------------------------------------------------------------------------------------------------------------------------------------------------------------------------------------------|------------------------------------------------------------------------------------------------------------------------------------------------------------------------------------------------------------------------------------------------------------------------------------------------------------------------------------------------------------------------------------------------------------------------------------------------------------------------------------------------------------------------------------------------------------------------------------------------------------------------------------------------------------------------------------------------------------------------------------------------------------------------------------------------------------------------------------------------------------------------------------------------------------------------------------------------------------------------------------------------------------------------------------------------------------------------------------------------------------------------------------------------------------------------------------------------------------------------------------------------------------------------------------------------------------------------------------------------------------------------------------------------------------------------------------------------------------------------------------------------------------------------------------------------------------------------------|-------------------------------------------------------------------------------------------------------------------------------------------------------------------------------------------------------------------------------------------------------------------------------------------------------------------------------------------------------------------------------------------------------------------------------------------------------------------------------------------------------------------------------------------------------------------------------------------------------------------------------------------------------------------------------------------------------------------------------------------------------------------------------------|
| <ul style="list-style-type: none"> <li>• type of healthcare setting</li> <li>• any existing participation structures in the organisation</li> <li>• social norms around hierarchy in the setting</li> <li>• Shared understanding of what co-production is</li> <li>• Inpatient mental health</li> <li>• community mental health</li> <li>• primary care</li> <li>• schools health programmes</li> <li>• general hospitals</li> <li>• social care</li> <li>• Compulsory treatment</li> <li>• Incarceration</li> <li>• False binary between service users/ EBE and staff. E.g. Peer support or EBE staff or staff who ‘happen’ to have lived experience (and disclose or do not)</li> <li>• Training routinely provided on co-production in the service</li> <li>• Staffing levels</li> <li>• Needs and individual circumstances of the</li> </ul> | <ul style="list-style-type: none"> <li>• Point at which young people are involved (e.g. outset)</li> <li>• Tokenism / service is self-congratulatory</li> <li>• Use of measures (validated / other)</li> <li>• Inclusion practices / cultural competence in the programme – adaptation of co-production process or environment for different learning styles, disabilities, interests, protected characteristics (response: experience of co-producing for the adolescents/other stakeholders)</li> <li>• The model of co-production used (EBCD, recovery colleges)</li> <li>• Tools/technologies of co-production used (e.g. practical activities, steering group)</li> <li>• Principles of co-production used</li> <li>• Participants were paid / remunerated</li> <li>• Age restrictions on participation</li> <li>• Training provided on co-production through the programme</li> <li>• Timing of the meetings</li> <li>• Protected staff time available</li> <li>• Funding for the programme</li> <li>• Space for meetings etc</li> <li>• Shared understanding of definitions (or conversely - disparate understandings)</li> <li>• Communication between meetings</li> <li>• Clear point of contact</li> <li>• Flexibility of facilitators (out of hours/ online meetings/ using email, allowing written responses rather than verbal etc)</li> <li>• Youth-led?</li> <li>• Mix of ages in the programme</li> <li>• Recruitment to the co-production (cherry picking / open invite / outreach)</li> <li>• Buy-in of participants</li> <li>• Power is shared</li> </ul> | <ul style="list-style-type: none"> <li>• services improve</li> <li>• new service designs emerge</li> <li>• positive or negative psychosocial impact of participation in a co-production initiative (and gains sustained over time) (co-production as a meaningful /therapeutic activity)</li> <li>• Who engages and who does not (Lack of diversity)</li> <li>• Compromise between principles and pragmatic approach/feasibility</li> <li>• Professionalisation / assimilation of YP (elite capture/deference politics)</li> <li>• Harm caused to participants</li> <li>• Outcomes for research and researchers (even if focus is service improvement)</li> <li>• Skills acquisition of participants</li> <li>• Ticks box for service but unsatisfying for service users</li> </ul> |

|                                                                                                                                                                                                                                                                                                                                                                                                                                                                                                                                                                                                                                                                                                                                                                                                     |                                                                                                                                                                                                                                                                                                                                                                                                                                                                                                                                                                                                                                                                                                                                                                                                                                                                                                                                                                                                                                                                                                                                                                                                                                                                                                                                                                                                                                                                                                                                                                                 |                                                                                                                                                                                                                                                                                                                                                                                                                                                                |
|-----------------------------------------------------------------------------------------------------------------------------------------------------------------------------------------------------------------------------------------------------------------------------------------------------------------------------------------------------------------------------------------------------------------------------------------------------------------------------------------------------------------------------------------------------------------------------------------------------------------------------------------------------------------------------------------------------------------------------------------------------------------------------------------------------|---------------------------------------------------------------------------------------------------------------------------------------------------------------------------------------------------------------------------------------------------------------------------------------------------------------------------------------------------------------------------------------------------------------------------------------------------------------------------------------------------------------------------------------------------------------------------------------------------------------------------------------------------------------------------------------------------------------------------------------------------------------------------------------------------------------------------------------------------------------------------------------------------------------------------------------------------------------------------------------------------------------------------------------------------------------------------------------------------------------------------------------------------------------------------------------------------------------------------------------------------------------------------------------------------------------------------------------------------------------------------------------------------------------------------------------------------------------------------------------------------------------------------------------------------------------------------------|----------------------------------------------------------------------------------------------------------------------------------------------------------------------------------------------------------------------------------------------------------------------------------------------------------------------------------------------------------------------------------------------------------------------------------------------------------------|
| <p>stakeholders (not all the same)</p> <ul style="list-style-type: none"> <li>• Different stakeholders views of project/programme success</li> <li>• Mental health lived experience of stakeholders</li> <li>• Power dynamics in the service</li> <li>• Philosophy/position/values of the service (e.g. is empowerment a priority?)</li> <li>• Power imbalance</li> <li>• Who are the end users?</li> <li>• Lived experience of participants (both service user and staff)</li> <li>• Skills in the team</li> <li>• Motivation of different stakeholders for participating</li> <li>• Long-term change within the service</li> <li>• Resistance (from status quo)</li> <li>• Geographical location</li> <li>• Literacy of participants</li> <li>• Mental health literacy of participants</li> </ul> | <ul style="list-style-type: none"> <li>• ‘Professional’ skills are required to participate (formal meetings with minutes, public speaking etc.)</li> <li>• What is being co-produced -taboo topics?</li> <li>• Process of managing expectations of stakeholders</li> <li>• Autonomy of stakeholders</li> <li>• Clear aims – what are you trying to achieve</li> <li>• Consideration of dignity</li> <li>• Process for managing power differences/hierarchy and responsibility</li> <li>• How risk / adverse events are managed</li> <li>• role clarity and balancing multi-disciplinary differences</li> <li>• Evaluation process</li> <li>• Buy in of different stakeholders</li> <li>• Funding</li> <li>• Space</li> <li>• Time (rushing/paced)</li> <li>• Food/snacks</li> <li>• Timelines</li> <li>• Support mechanisms in place</li> <li>• Transparency</li> <li>• Diversity and inclusivity</li> <li>• Accessibility considerations</li> <li>• Addressing power imbalance</li> <li>• Priorities being set</li> <li>• Consideration of psychological safety of young people / all</li> <li>• Follow up</li> <li>• Use of inclusive language/ knowledge accessibility/ audience/ user appropriate</li> <li>• Use of frameworks/models/standards of engagement</li> <li>• Consideration of whether co-production is appropriate prior to starting the project</li> <li>• Pastoral /psychological support available for participants</li> <li>• Recognition of contribution (e.g in publications / websites / events)</li> <li>• Participants ‘age out’</li> <li>•</li> </ul> | <ul style="list-style-type: none"> <li>• Treatment in the service improves</li> <li>• Programme / participants are co-opted</li> <li>• Optimism / scepticism of participants at the end of the programme</li> <li>• Changed confidence of participants of participants at the end of the programme</li> <li>• Marginalised groups are included or excluded</li> <li>• measurable changes within a service</li> <li>• Resources ‘age out’</li> <li>•</li> </ul> |
|-----------------------------------------------------------------------------------------------------------------------------------------------------------------------------------------------------------------------------------------------------------------------------------------------------------------------------------------------------------------------------------------------------------------------------------------------------------------------------------------------------------------------------------------------------------------------------------------------------------------------------------------------------------------------------------------------------------------------------------------------------------------------------------------------------|---------------------------------------------------------------------------------------------------------------------------------------------------------------------------------------------------------------------------------------------------------------------------------------------------------------------------------------------------------------------------------------------------------------------------------------------------------------------------------------------------------------------------------------------------------------------------------------------------------------------------------------------------------------------------------------------------------------------------------------------------------------------------------------------------------------------------------------------------------------------------------------------------------------------------------------------------------------------------------------------------------------------------------------------------------------------------------------------------------------------------------------------------------------------------------------------------------------------------------------------------------------------------------------------------------------------------------------------------------------------------------------------------------------------------------------------------------------------------------------------------------------------------------------------------------------------------------|----------------------------------------------------------------------------------------------------------------------------------------------------------------------------------------------------------------------------------------------------------------------------------------------------------------------------------------------------------------------------------------------------------------------------------------------------------------|

**Developing a set of initial 'If...then' statements covering major areas of the programme's architecture (what is about A that leads to B?) from the CMO brainstorm:**

| <b>Keyword</b>                                               | <b>Context</b>                                                                                                  | <b>Mechanism (resource)</b>                                                                                            | <b>Outcome</b>                                                                                                                                                    | <b>Mechanism (response)</b>                                                                                                                                                                              |
|--------------------------------------------------------------|-----------------------------------------------------------------------------------------------------------------|------------------------------------------------------------------------------------------------------------------------|-------------------------------------------------------------------------------------------------------------------------------------------------------------------|----------------------------------------------------------------------------------------------------------------------------------------------------------------------------------------------------------|
| Topics avoided (e.g. risk)                                   | A risk-averse culture in the mental health service                                                              | If the young people are only invited to co-produce on specific topics but others are avoided (e.g. risk management)    | then they may leave the programme or give limited contributions.                                                                                                  | Because they will not feel they have been included as equals and will lack trust in the sincerity of the programme.                                                                                      |
| Professionalisation                                          | Norms of participation practices within the service.                                                            | If 'professional' skills are required to participate (e.g. attending formal meetings, public speaking, taking minutes) | then the programme will lack diversity.                                                                                                                           | Because a self-selecting group of stakeholders who are experienced with or interested in these activities will participate and those who prefer other communication or activity approaches will opt out. |
| Compulsory treatment                                         | Treatment under the Mental Health Act (specifically: compulsory treatment/ incarceration in locked MH services) | If young people cannot opt out of treatment within the service                                                         | then co-production efforts in the environment will fail.                                                                                                          | Because it will not be possible to facilitate equal power between participants (which is a core principle of co-production).                                                                             |
| Co-optation, assimilation, elite capture, deference politics | The programme does not have the power to make meaningful changes within the service.                            | Stakeholders have different views of service improvement at outset.                                                    | Co-production 'works' for those who support status quo, not for those who seek change. (Service mostly unchanged, co-producers assimilate to support status quo). | Stakeholders adjust their expectations of change/compromise principles through a functionalist response (what can be done within the limits of this context?).                                           |
| RIVAL THEORY<br>Non-assimilation                             | The programme does not have the power to make meaningful changes within the service.                            | Stakeholders have different views of service improvement at outset.                                                    | Service users disengage or seek other routes to change outside of co-production. (e.g. psych abolition, campaigning, legal challenges)                            | The co-production programme is perceived by the users as tokenistic (and the service is perceived as self-congratulatory).                                                                               |

|                                          |                                                                                                                                                                                                             |                                                                                                                                                                                                                                                                                          |                                                                                                                                                                               |                                                                                                    |
|------------------------------------------|-------------------------------------------------------------------------------------------------------------------------------------------------------------------------------------------------------------|------------------------------------------------------------------------------------------------------------------------------------------------------------------------------------------------------------------------------------------------------------------------------------------|-------------------------------------------------------------------------------------------------------------------------------------------------------------------------------|----------------------------------------------------------------------------------------------------|
| Co-production knowledge shared           | Culture of participation in the organisation (shared understanding from existing structures/training)                                                                                                       | Training on principles/model/framework of co-production provided                                                                                                                                                                                                                         |                                                                                                                                                                               | A shared understanding of co-production emerges                                                    |
| Inclusive practice / cultural competence | Organisational values of inclusion and how these are enacted day-to-day.<br><br>ALSO<br><br>Stakeholders' individual experiences/ circumstances/ views/ needs/ roles/ identities/ protected characteristics | If the facilitators utilise cultural competence and inclusion practices (e.g. consider timing of meetings, flexible to online/in-person, mindful of language use, pronouns, pacing content, trigger warnings, recruitment of programme participants, discuss racism/discrimination etc.) | Then, marginalised groups are better included and more likely to stay involved, consequently, the group participating is more 'representative' of the potential stakeholders. | Because the participants experience greater psychological safety and feel more welcome / included. |
| Time, space, money                       | Pressures on the service (e.g. staffing levels, performance targets, infrastructure/funding for the service overall)                                                                                        | If the programme is well-resourced (has funding, protected staff time/few staff vacancies, spaces to meet in, snacks!)                                                                                                                                                                   | Then co-production is more successful (new designs emerge/service and treatment quality improves).                                                                            | Because stakeholders feel valued and have the energy to engage.                                    |
| Communication                            |                                                                                                                                                                                                             | If there is a clear point of contact and good communication about the programme between meetings                                                                                                                                                                                         |                                                                                                                                                                               | Because of a shared understanding and buy-in for the work.                                         |
| Aims / evaluation                        | Service Philosophy/vision/values                                                                                                                                                                            | If there are clear aims, transparency about the project scope and evaluation of the aims.                                                                                                                                                                                                |                                                                                                                                                                               | Because participants feel respected and have a shared understanding of success.                    |
| Planning                                 | Service Philosophy/vision/values                                                                                                                                                                            | If sufficient planning takes place to establish if co-production is appropriate, the project scope and managing risk.                                                                                                                                                                    |                                                                                                                                                                               | Because stakeholders 'buy in' to the usefulness of co-production.                                  |
| Addressing power imbalance               | Hierarchy in the service                                                                                                                                                                                    | If power is explicitly discussed and there is a process in place for managing power differentials/hierarchy and responsibility within the group.                                                                                                                                         | Then power is shared more equally amongst participants.                                                                                                                       | Because participants are aware of their relative power and a shared agreement to re-balance.       |

|                                                         |                                                                                               |                                                                                                                                                       |                                                                                                                                                                                                                                                                                                                                                                                                                             |                                                                                                                                        |
|---------------------------------------------------------|-----------------------------------------------------------------------------------------------|-------------------------------------------------------------------------------------------------------------------------------------------------------|-----------------------------------------------------------------------------------------------------------------------------------------------------------------------------------------------------------------------------------------------------------------------------------------------------------------------------------------------------------------------------------------------------------------------------|----------------------------------------------------------------------------------------------------------------------------------------|
| Youth-led                                               | Co-production is feasible at the planning stage (not brought in once a project is identified) | If young people are involved from the outset of a co-production programme                                                                             | Then the programme is more likely to truly reflect the needs and ideas of those with lived experience                                                                                                                                                                                                                                                                                                                       | Because young people shape the direction/priorities of the work, and identify the focus at the co-planning stages.                     |
| Service type                                            | Type of mental health service (and therefore who are the end users)                           |                                                                                                                                                       |                                                                                                                                                                                                                                                                                                                                                                                                                             |                                                                                                                                        |
| False dichotomy expert by experience/expert by training | Unspoken mental health lived experience of staff                                              |                                                                                                                                                       |                                                                                                                                                                                                                                                                                                                                                                                                                             |                                                                                                                                        |
| Recognition                                             |                                                                                               | If there is appropriate recognition of stakeholder contribution (financial, named author, speak at events, named on website, thanked at an event etc) | Then the programme has a positive psycho-social impact on participants.                                                                                                                                                                                                                                                                                                                                                     | Because stakeholders feel valued.                                                                                                      |
| Psychological or pastoral support                       | Reflective practices/ structures of support in the organisation                               | If psychological or pastoral support is available for stakeholders                                                                                    | Then the programme has a positive psycho-social impact on participants.                                                                                                                                                                                                                                                                                                                                                     | Because of increased psychological safety and reduction of psychological harm.                                                         |
| Aging out / epistemic injustice                         | Global/local understanding of 'youth'                                                         | If there is an age restriction on participating.                                                                                                      | <p>Programme - Then the programme retains legitimacy (stakeholders have recent experience).</p> <p>participants – then young people will experience loss of role and change in identity as they 'age out'.</p> <p>products – then the products of the co-production project will logically also become less relevant over time as the contributors age and their experience which was contributed is less contemporary.</p> | Because these stakeholders 'youth'/age is perceived by all stakeholders to give epistemic legitimacy to their participation/knowledge. |

|                          |                                                     |                                                                                                                                                                                                                                                                                                                       |  |  |
|--------------------------|-----------------------------------------------------|-----------------------------------------------------------------------------------------------------------------------------------------------------------------------------------------------------------------------------------------------------------------------------------------------------------------------|--|--|
|                          | Literacy and mental health literacy of stakeholders |                                                                                                                                                                                                                                                                                                                       |  |  |
| Product of co-production |                                                     | <p>What is being co-produced e.g.:</p> <ul style="list-style-type: none"> <li>• therapy/treatment itself</li> <li>• a service design/re-design</li> <li>• training materials for staff</li> <li>• patient leaflets</li> <li>• apps / websites</li> <li>• service environment</li> <li>• service evaluation</li> </ul> |  |  |
| Method of co-production  |                                                     | <p>Tools/Techniques e.g.:</p> <ul style="list-style-type: none"> <li>• advisory group</li> <li>• peer support staff</li> <li>• community meetings</li> <li>• involved in staff recruitment/training</li> </ul>                                                                                                        |  |  |
